# Supplementary material for: Adverse Effects on β‐Adrenergic Receptor Coupling: Ischemic Postconditioning Failed to Preserve Long‐Term Cardiac Function
Source: PubMed Central journal article supplement — J Am Heart Assoc. 2017 Dec 22;6(12):e006809. doi: 10.1161/JAHA.117.006809 (PMC5779008; doi:10.1161/jaha.117.006809), 2017-12-22
Supplement: JAH3-6-e006809-s001.pdf [file JAH3-6-e006809-s001.pdf]

# **SUPPLEMENTAL MATERIAL**

**Table S1. Functional and morphological data assessed by echocardiography.**

|                   | Sham      | IR         | IPC       | IPoC       |
|-------------------|-----------|------------|-----------|------------|
| <b>FS (%)</b>     | 59.8±11.9 | 42.9±10.3* | 49.8±13.9 | 32.2±12.0* |
| <b>IVSd (mm)</b>  | 1.65±0.50 | 1.74±0.32  | 1.83±0.40 | 1,52±0.23  |
| <b>LVPWd (mm)</b> | 1.62±0.37 | 1.84±0.22  | 1.90±0.34 | 1.86±0.32  |
| <b>LVPWs (mm)</b> | 2.53±0.34 | 2.71±0.44  | 2.86±0.47 | 2.61±0.60  |
| <b>LVIDd (mm)</b> | 5.25±0.89 | 5.75±1.28  | 5.52±0.94 | 6.03±0.58  |
| <b>LVIDs (mm)</b> | 2.69±1.32 | 3.23±0.90  | 2.88±1.10 | 3.43±0.63  |

FS (%): fractional shortening, IVSd (mm): end-diastolic interventricular septum thickness, LVPWd (mm): left ventricular posterior wall thickness in diastole, LVPWs (mm): left ventricular posterior wall thickness in systole, LVIDd (mm): left ventricular internal diameter in diastole, LVIDs (mm): left ventricular internal diameter in systole. Data are means  $\pm$  S.D. of n=6-10 animals. \*,  $p \leq 0.05$  vs. Sham.

**Figure S1. The validity of TnI as a marker to determine the infarct size.**

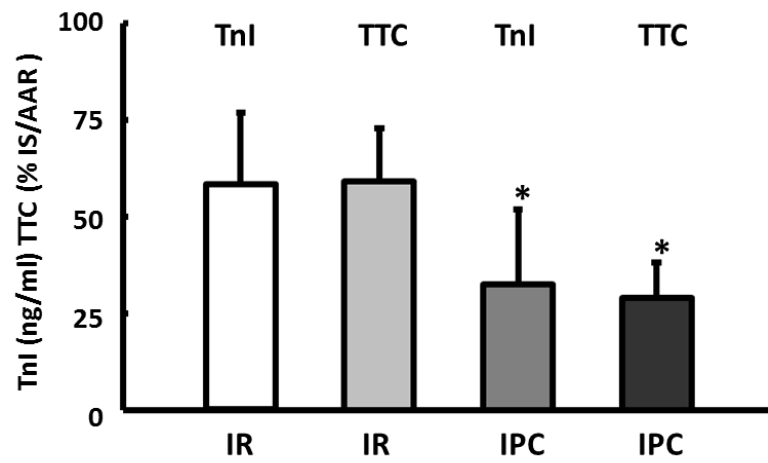

Plasma TnI values that were measured one hour after the start of the reperfusion confirm a reduction of the particular size of the infarct to the same magnitude as determined using TTC staining two hours after the start of the reperfusion. Data are means  $\pm$  S.D. of n=6 hearts. \*,  $p \leq 0.05$  vs. IR.

Figure S2. Expression pattern of  $\beta$ -ARs in left ventricular tissue.

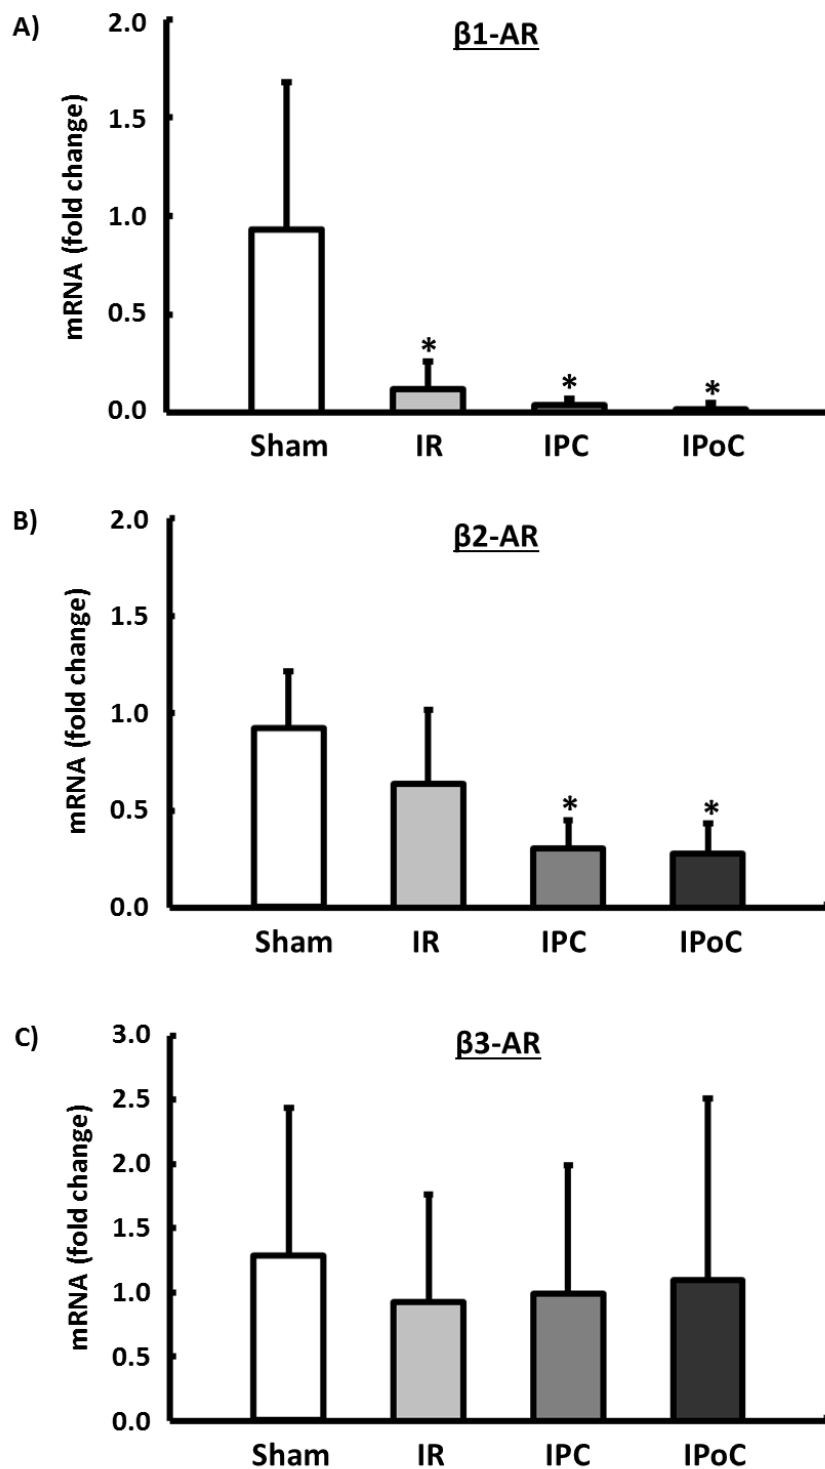

**A-C)** The mRNA expression of the  $\beta_1$ - and  $\beta_2$ -AR subtypes was reduced in the hearts in the IR, IPC and IPoC groups compared to the sham group seven days after the infarction. However, the expression of the  $\beta_3$ -AR remained stable and was unaffected by either IPC or IPoC. Data are means  $\pm$  S.D. of  $n=6$  hearts. \*,  $p \leq 0.05$  vs. Sham.

**Figure S3. The effect of GRK2 and  $\beta$ -arrestin on the contraction of isolated ventricular cardiomyocytes.**

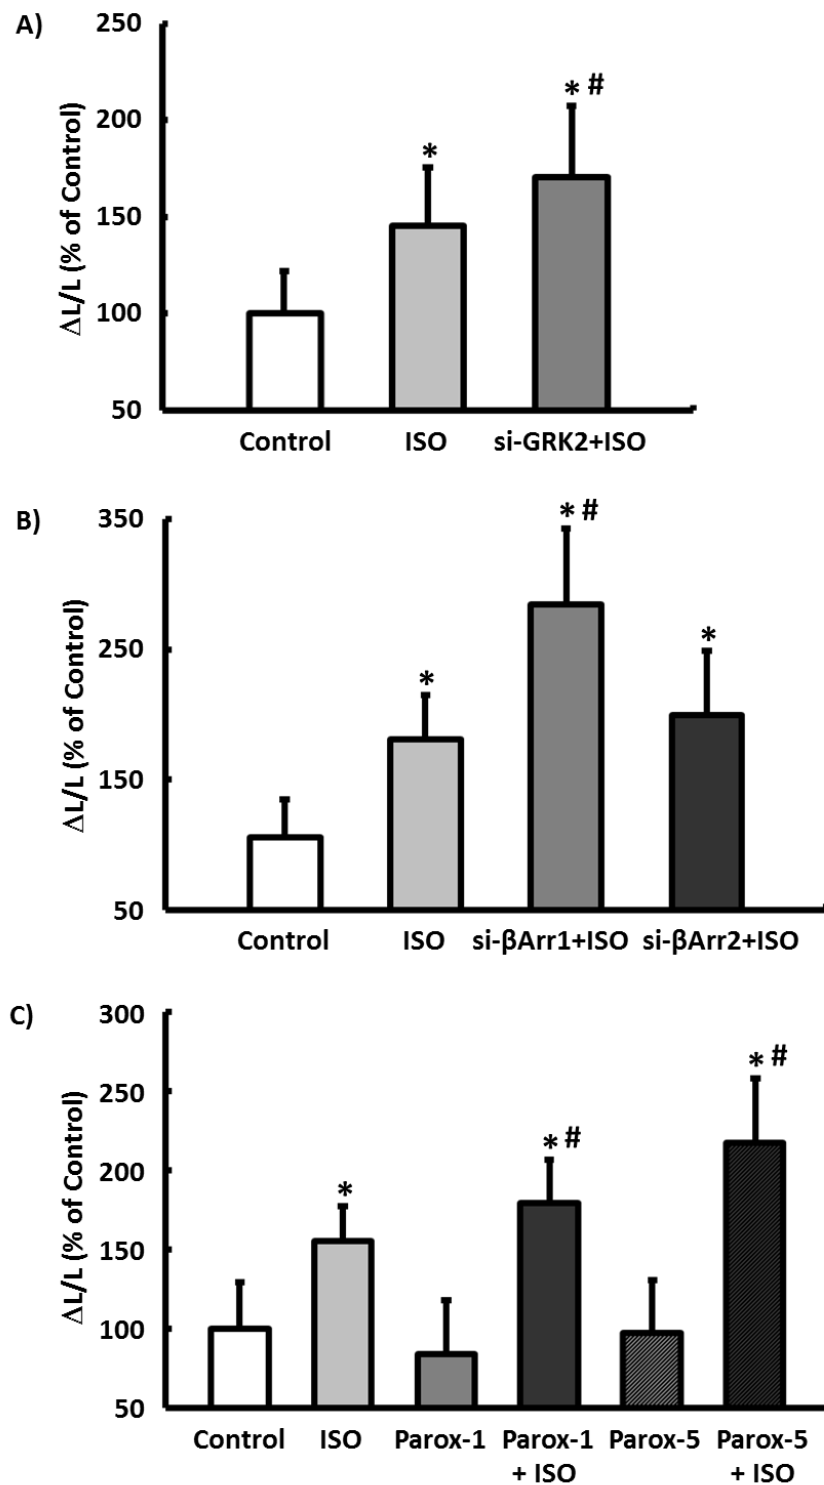

The importance of GRK2 and  $\beta$ -arrestin for the  $\beta$ -AR-mediated positive inotropic response of the myocardium was investigated using a model of left ventricular cardiomyocytes isolated from three-month-old Wistar rats. GRK2,  $\beta$ -arrestin 1

and  $\beta$ -arrestin 2 were selectively and effectively downregulated by transfection with siRNA over 24 hours (Figure S6A,B). The load free cell shortening before and after stimulation with ISO was then determined. **A)** In untreated cardiomyocytes ISO improved basal cell shortening by  $45 \pm 9\%$ . Cardiomyocytes in which the GRK2 was previously downregulated were sensitised to the  $\beta$ -adrenergic stimulus and showed an improvement in the cell shortening of about  $70 \pm 15\%$ . **B)** Specifically knocking down the  $\beta$ -arrestin 1 isoform improved the ISO-induced cell shortening by  $57 \pm 12\%$  while the  $\beta$ -adrenergic stimulation after successful knockdown of  $\beta$ -arrestin 2 did not differ significantly from ISO treated cells. Transfection of the cardiomyocytes with nonsense siRNA over 24 hours did not have any effect on cell shortening. **C)** The use of GRK2-specific siRNA was supplemented in the cell culture model described above by application of the selective GRK2 inhibitor paroxetine. After a 15-minute pre-incubation with paroxetine, the ISO-induced increase in cell shortening increased in a concentration-dependent manner from  $55 \pm 8\%$  to  $79 \pm 12\%$  ( $1 \mu\text{M}$ ) and to  $117 \pm 22\%$  ( $5 \mu\text{M}$ ). Data are means  $\pm$  S.D. of  $n=3$  hearts. \*,  $p \leq 0.05$  vs. Control, #,  $p \leq 0.05$  vs. ISO.

**Figure S4. The functional relevance of GRK2 in ex-vivo perfused hearts.**

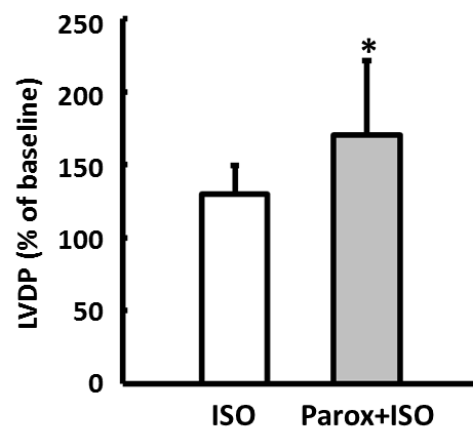

Using the Langendorff technique, rat hearts were initially perfused for 10 min with paroxetine and then stimulated for a further 5 min with ISO in the presence of paroxetine. Hearts that had not had their GRK2 inhibited responded to the  $\beta$ -adrenergic stimulation with an increase in the LVDP of  $30 \pm 20\%$  while the LVDP of hearts perfused with paroxetine increased by  $71 \pm 51\%$ . Data are means  $\pm$  S.D. of  $n=4$  hearts. \*,  $p \leq 0.05$  vs. ISO.

**Figure S5. Concentration – response curves to isoprenaline (ISO) in isolated cardiomyocytes.**

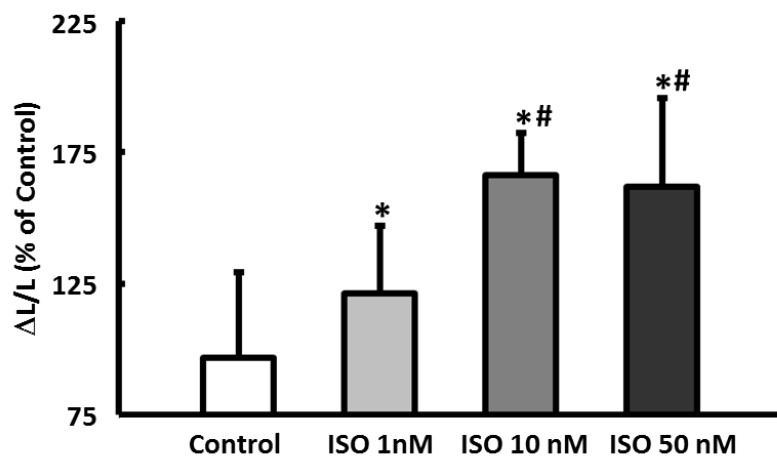

Left ventricular cardiomyocytes isolated from three-month-old Wistar rats were used to determine the ISO concentration used in all experiments to measure the  $\beta$ -AR-mediated positive inotropic response. The ISO-induced increase in cell shortening increased in a concentration-dependent, however, concentrations above 10 nM had no further effects. Data are means  $\pm$  S.D. of  $n=3$  hearts. \*,  $p \leq 0.05$  vs. Control, #,  $p \leq 0.05$  vs. ISO 1 nM.

**Figure S6. Western blot analysis to assess the efficiency of the siRNA-mediated knockdown.**

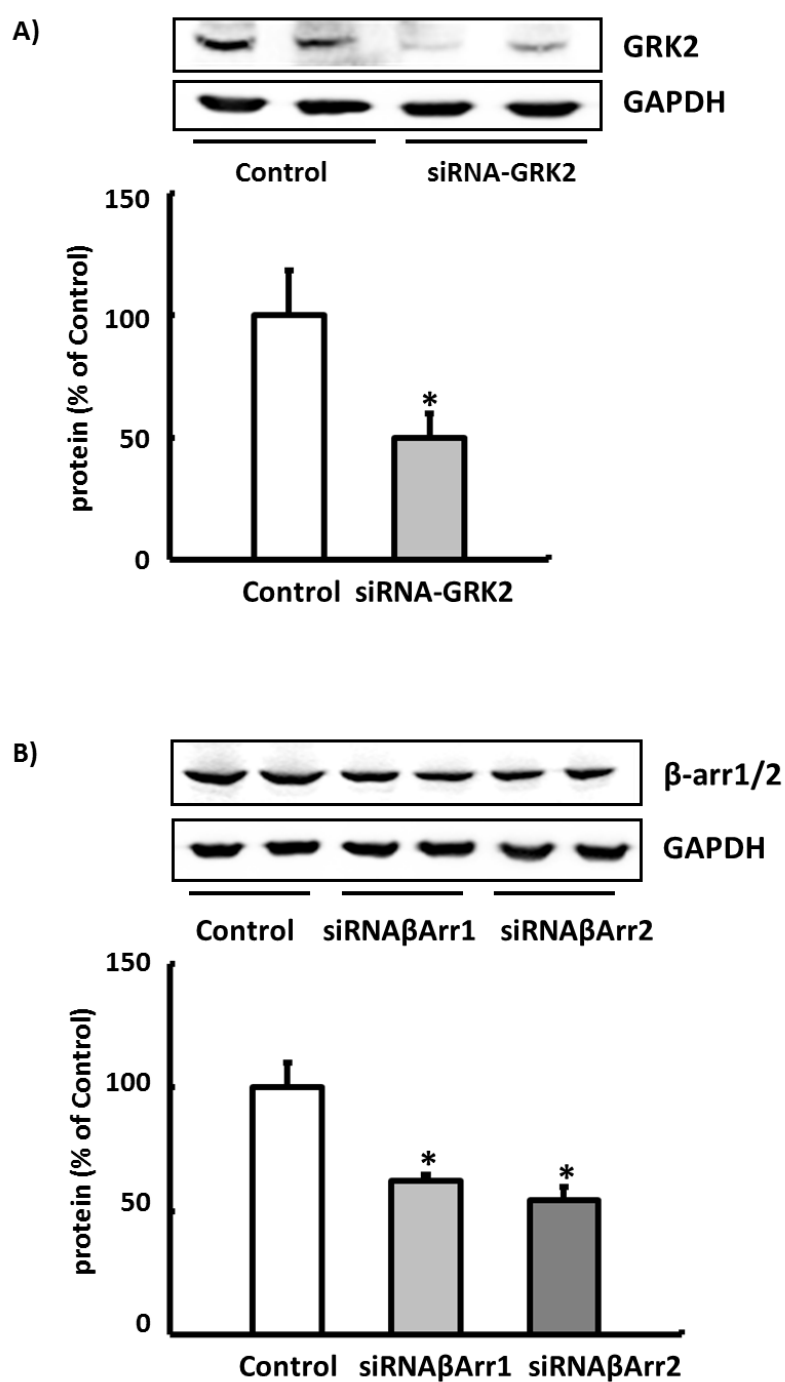

**A-B)** Representative immunoblots and densitometric analysis: the expression of GRK2 (A),  $\beta$ -arrestin1 and  $\beta$ -arrestin2 (B) was analysed 24 hours after transfection of isolated cardiomyocytes. Data are means  $\pm$  S.D. of  $n=3$  hearts. \*,  $p \leq 0.05$  vs. Control.
